# Supplementary material for: Functional screening of aldehyde decarbonylases for long-chain alkane production by Saccharomyces cerevisiae
Source: PubMed Central journal article supplement (PMC5414326; doi:10.1186/s12934-017-0683-z), 2017-05-02
Supplement: 12934_2017_683_MOESM1_ESM.pdf [file 12934_2017_683_MOESM1_ESM.pdf]

**Additional file 1 for**

**Functional screening of aldehyde decarbonylases for long-chain alkane production in**

***Saccharomyces cerevisiae***

Min-Kyoung Kang, Yongjin J Zhou, Nicolaas A. Buijs, and Jens Nielsen \*

\*Correspondence to: Jens Nielsen E-mail: [nielsenj@chalmers.se](mailto:nielsenj@chalmers.se)

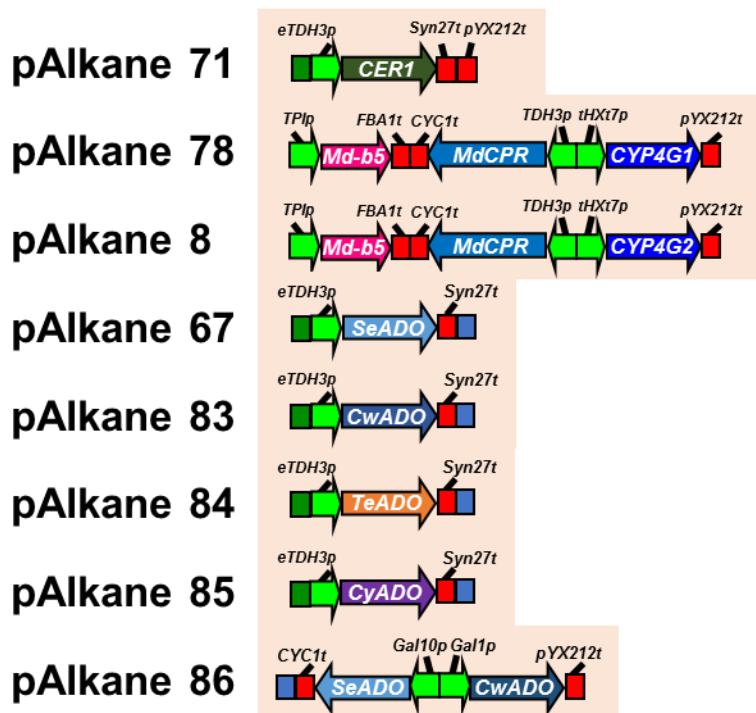

**Figure S1.** Scheme of plasmid constructs for alkane biosynthesis. pYX212 vector was used as a backbone to express ADs in engineered *S. cerevisiae* strains.

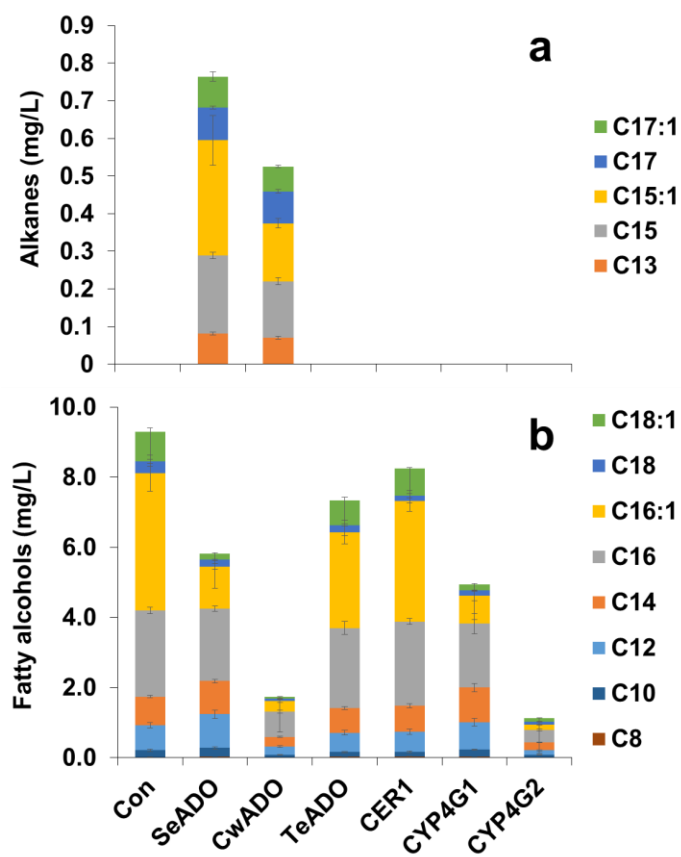

**Figure S2.** Comparison of alkane and fatty alcohol production by different AD expression in engineered *S. cerevisiae* strains. Alkane (a) and fatty alcohol (b) titers were displayed with the information of chain-length distribution of each engineered strain. All data represent the mean values and standard deviations from at least triplicate cultures.

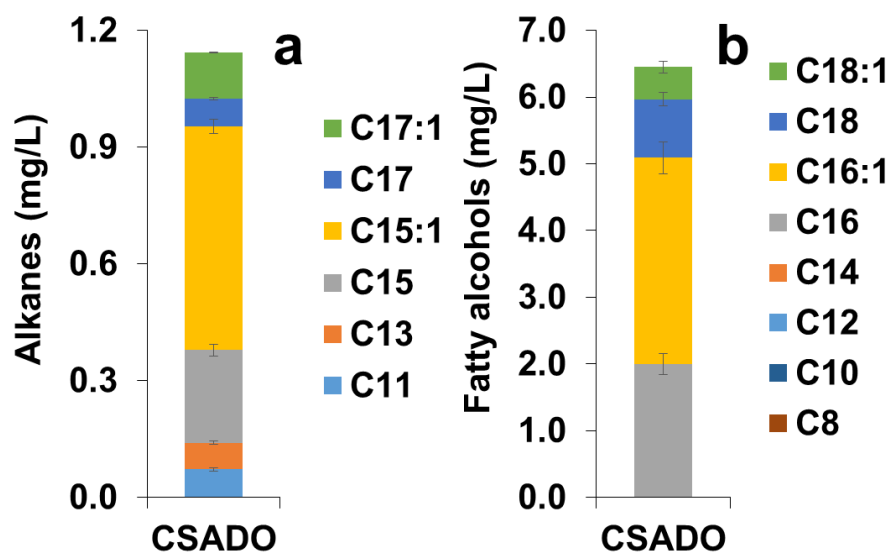

**Figure S3.** Production of alkanes (a) and fatty alcohols (b) with the information of chain-length distribution in the CSADO strain. All data represent the mean values and standard deviations from at least triplicate cultures.

**Table S1. Primers used in this study**

| Name     | Sequence (5'→ 3')                                                                                                    |
|----------|----------------------------------------------------------------------------------------------------------------------|
| pYX212-F | TAGGGCCCAACAAGCTTACGCGTCGACCCGGGTATCC                                                                                |
| pYX212-R | GCCGTAAACCACTAAATCGGAACCCTAAAGG                                                                                      |
| eTDH3p-F | CTTTCACCAGCGTTTC                                                                                                     |
| TDH3p-F  | CTCGAGTTTATCATTATCAATACTGCCATTTTC                                                                                    |
| TDH3p-R  | GTTTGTTTATGTGTGTTTATTCGAAACTAAGTTCTTGGTG                                                                             |
| tHXT7p-F | GTATTCTTTGAAATGGCAGTATTGATAATGATAAACTCGAGCTCGTAGGAACAATTTCC                                                          |
| tHXT7p-R | CATTTTTTGATTAATAAATAAAAACTTTTTGTTTTGTG                                                                               |
| TDI1p-F  | GTTTAAAGATTACGGATATTTAACTTACTTAGAATAATG                                                                              |
| TDI1p-R  | CATTTTTAGTTTATGTATGTGTTTTTTGTAG                                                                                      |
| GAL1p-R  | CATTATAGTTTTTCTCCTTGACGTTAAAG                                                                                        |
| GAL10p-R | CATTTATATTGAATTTTCAAAAATTCTTAC                                                                                       |
| FBA1t-F  | GTTAATTCAAATTAATTGATATAGTTTTTTAATGAG                                                                                 |
| FBA1t-R  | AGTAAGCTACTATGAAAGACTTTACAAAGAAC                                                                                     |
| CER1-F   | CAAGAACTTAGTTTTCGAATAAACACACATAAACAAACAAAATGGCTACAAAACCAGGTGCTTTG                                                    |
| CER1-R   | CTAGACAGTTATATATATATATATATATATATATATATATACCACCCATTAGTGATGAGGTAACAACAATGG                                             |
| CYP4G1-F | CAAAAACAAAAGTTTTTTAATTTAATCAAAAATGGCCGTTGAAGTTGTTCAAGAAACC                                                           |
| CYP4G1-R | GGATACCCGGGTGCGACGCGTAAGCTTGTGGGCCCTATTAAGCAACAGTAGCGTATTGTCTC                                                       |
| CYP4G2-F | CACAAAACAAAAGTTTTTTAATTTAATCAAAAATGGACTCCGCCAACAACTC                                                                 |
| CYP4G2-R | GGATACCCGGGTGCGACGCGTAAGCTTGTGGGCCCTATTACATTGCCTTCATTGCTTC                                                           |
| MdCPR-F  | CAAGAACTTAGTTTTCGAATAAACACACATAAACAAACAAAATGAGTGCCGAACACGTTGAAG                                                      |
| MdCPR-R  | GTGACATAACTAATTACATGACTCGAGGTGCGACGGTATCTTAACTCCAAACATCAGCGGAG                                                       |
| Md-b5-F  | CTATAACTACAAAACACATACATAAACTAAAAATGTCTCCGAAGATGTAAAG                                                                 |
| Md-b5-R  | CTCATTAAAAACTATATCAATTAATTTGAATTAACTTATTGTGACTTAGTACCAAAG                                                            |
| SeADO-F  | GAACCTAGTTTTCGAATAAACACACATAAACAAACAAAATGCCACAATTAGAAGCCTCC                                                          |
| SeADO-R  | GATACCCGGGTGCGACGCGTAAGCTTTGAAAGATGATACTCTTTATTTCTAGACAGTTATATATATATATATATATATATATATACCACCCATTAGACTGCTGCCAAACCGTATGC |
| CwADO-F  | GAACCTAGTTTTCGAATAAACACACATAAACAAACAAAATGCAAGAATTGGCAGTCAGAAGTG                                                      |

|             |                                                                              |
|-------------|------------------------------------------------------------------------------|
| CwADO-R     | CTAGACAGTTATATATATATATATATATATATATATATATATACCACCCATTAGACAGCGGCTAAACCGTGGGCTG |
| TeADO-F     | GAACTTAGTTTTCGAATAAACACACATAAACAAACAAAATGACTACTGCCACCGCTACTCCTG              |
| TeADO-R     | CTAGACAGTTATATATATATATATATATATATATATATATATACCACCCATTAAGCACCAGTCAAACATAAAC    |
| CyADO-F     | GAACTTAGTTTTCGAATAAACACACATAAACAAACAAAATGCCACAAGTTCAATCCCCATCC               |
| CyADO-R     | CAGTTATATATATATATATATATATATATATATATATACCACCCATTAAGCAGCGGACAAACCATAAACAG      |
| CwADO-F(86) | GTTAATATACCTCTATACTTTAACGTCAAGGAGAAAAAACTATAATGCAAGAATTGGCAGTCAGAAGTG        |
| CwADO-R(86) | GGATACCCGGGTCGACGCGTAAGCTTGTGGGCCCTATTAGACAGCGGCTAAACCGTGGGCTG               |
| SeADO-F(86) | GTCCATCCAAAAAAAAAAGTAAGAATTTTTGAAAATTCAATATAAATGCCACAATTAGAGCCTCCTTAG        |
| SeADO-R(86) | CATAACTAATTACATGACTCGAGGTCGACGGTATCTTAGACTGCTGCCAAACCGTATGCGGAC              |
